# Supplementary material
Source: PubMed Central journal article supplement (PMC7755252)
Supplement: AEM.02268-20-s0001.pdf [file AEM.02268-20-s0001.pdf]

## Supplemental material

### Multispecies diesel fuel biodegradation and niche formation are ignited by pioneer hydrocarbon-utilizing proteobacteria in a soil bacterial consortium

Jiro F. Mori and Robert A. Kanaly

Graduate School of Nanobiosciences, Yokohama City University, Yokohama, Japan

- Table S1** Relative abundances of 16S rRNA gene amplicon OTUs detected from the consortium grown on different hydrocarbon sources.
- Table S2** Statistics for metagenomes of the consortium grown on diesel fuel.
- Table S3** Presence of aromatic hydrocarbon / alkane degradation genes detected in the bacterial MAGs.
- Table S4** Results of LC/ESI(-)-MS/MS analyses of sample extracts to identify biotransformation products of different parent aromatic compounds.
- Table S5** Presence of flagellar formation and chemotaxis genes in the bacterial MAGs.
- Figure S1** Results of LC/ESI(-)-MS/MS analyses of extracts from SBM where *S. barthaii* KK22 was exposed to 50 mg/l of 1-hydroxy-2-naphthoic acid.
- Figure S2** Results of LC/ESI(-)-MS/MS analyses of extracts from SBM where *S. barthaii* KK22 was exposed to 50 mg/l of toluene.
- Figure S3** Results of LC/ESI(-)-MS/MS analyses of the deprotonated molecule,  $[M - H]^- = 141$  for an authentic standard of catechol and for extracts from SBM where *Cupriavidus* strain KK10 was exposed to either 50 mg/l of salicylic acid or 50 mg/l of benzoic acid.
- Figure S4** Results of LC/ESI(-)-MS/MS analyses of extracts from SBM where *Achromobacter* strain KK8 was exposed to 50 mg/l of salicylic acid.

**Table S1.** Relative abundances of 16S rRNA gene amplicon OTUs detected from the consortium grown on different hydrocarbon sources.

| OTU Taxonomy                                                                                      | Relative abundance (%) |          |             |       |       |       |       |       |
|---------------------------------------------------------------------------------------------------|------------------------|----------|-------------|-------|-------|-------|-------|-------|
|                                                                                                   | Diesel-1               | Diesel-2 | Diesel avg. | NAPL  | HEX   | PHE   | NAP   | TOL   |
| 1 Gammaproteobacteria / Pseudomonadales / Pseudomonadaceae / <b>Pseudomonas</b>                   | 74.21                  | 67.20    | 70.71       | 79.20 | 84.22 | 21.21 | 22.28 | 2.77  |
| 2 Alphaproteobacteria / Sphingomonadales / Sphingomonadaceae / <b>Sphingobium</b>                 | 8.57                   | 16.11    | 12.34       | 10.14 | 0.10  | 53.36 | 42.61 | 53.46 |
| 3 Alphaproteobacteria / Rhizobiales / Brucellaceae / <b>Ochrobactrum</b>                          | 5.77                   | 6.47     | 6.12        | 0.63  | 3.24  | 4.35  | 5.90  | 3.61  |
| 4 Betaproteobacteria / Burkholderiales / Alcaligenaceae / <b>Achromobacter</b>                    | 5.21                   | 3.92     | 4.57        | 4.92  | 2.99  | 18.51 | 26.12 | 16.11 |
| 5 Betaproteobacteria / Burkholderiales / Oxalobacteraceae / <b>Cupriavidus</b>                    | 2.06                   | 2.32     | 2.19        | 0.55  | 0.07  | 0.79  | 0.86  | 18.85 |
| 6 Alphaproteobacteria / Rhizobiales / Hyphomicrobiaceae / <b>Parvibaculum</b>                     | 1.16                   | 1.00     | 1.08        | 0.01  | 0.01  | 0.14  | 0.05  | 0.08  |
| 7 Bacteroides / Shingobacteriia / Sphingobacteriales / Sphingobacteriaceae / <b>Olivibacter</b>   | 0.93                   | 0.97     | 0.95        | 1.63  | 2.43  | 0.95  | 0.54  | 3.10  |
| 8 Alphaproteobacteria / Rhizobiales / Bradyrhizobiaceae / <b>Bradyrhizobium</b>                   | 0.53                   | 0.35     | 0.44        | 0.00  | 0.05  | 0.06  | 0.43  | 0.34  |
| 9 Gammaproteobacteria / Xanthomonadales / Xanthomonadaceae / <b>Dokdonella</b>                    | 0.39                   | 0.47     | 0.43        | 0.29  | 0.35  | 0.08  | 0.12  | 0.05  |
| 10 Gammaproteobacteria / Xanthomonadales / Xanthomonadaceae / <b>Rhodanobacter</b>                | 0.43                   | 0.24     | 0.33        | 0.14  | 0.96  | 0.00  | 0.07  | 0.00  |
| 11 Alphaproteobacteria / Rhizobiales / Bradyrhizobiaceae / <b>Bradyrhizobium</b>                  | 0.26                   | 0.27     | 0.26        | 0.00  | 0.00  | 0.00  | 0.00  | 0.00  |
| 12 Alphaproteobacteria / Rhizobiales / Phyllobacteriaceae / <b>Mesorhizobium</b>                  | 0.16                   | 0.20     | 0.18        | 0.00  | 0.00  | 0.04  | 0.00  | 0.13  |
| 13 Gammaproteobacteria / Xanthomonadales / Xanthomonadaceae / <b>Rhodanobacter</b>                | 0.16                   | 0.11     | 0.14        | 0.43  | 3.45  | 0.28  | 0.60  | 0.53  |
| 14 Alphaproteobacteria / Rhizobiales / Hyphomicrobiaceae / <b>Parvibaculum</b>                    | 0.08                   | 0.08     | 0.08        | 0.00  | 0.00  | 0.00  | 0.03  | 0.19  |
| 15 Alphaproteobacteria / Sphingomonadales / Sphingomonadaceae / <b>Sphingomonas</b>               | 0.05                   | 0.05     | 0.05        | 0.11  | 0.22  | 0.04  | 0.00  | 0.02  |
| 16 Actinobacteria / Actinomycetales / Corynebacterineae / Mycobacteriaceae / <b>Mycobacterium</b> | 0.00                   | 0.00     | 0.00        | 1.75  | 1.69  | 0.00  | 0.00  | 0.00  |
| Other (minor bacterial genera of Rhizobiales, Gemmatales, or Rhodospirillales)                    | 0.04                   | 0.23     | 0.14        | 0.17  | 0.23  | 0.20  | 0.39  | 0.76  |

**Table S2.** Statistics for metagenomes of the consortium grown on diesel fuel.

| IMG genome ID | Paired reads | Quality paired reads | Contigs | Total bases | CDS   | tRNA | tRNA |
|---------------|--------------|----------------------|---------|-------------|-------|------|------|
| 3300038749    | 23376413     | 21670846             | 65960   | 83291099    | 74942 | 706  | 53   |

**Table S3.** Presence of aromatic hydrocarbon / alkane degradation genes detected in the bacterial MAGs.

| Gene                                                                                                                                                 | <i>Pseudomonas</i> | <i>Sphingobium</i> | <i>Ochrobactrum</i> | <i>Achromobacter</i> | <i>Cupriavidus</i> | <i>Parvibaculum</i> |
|------------------------------------------------------------------------------------------------------------------------------------------------------|--------------------|--------------------|---------------------|----------------------|--------------------|---------------------|
| <b>Naphthalene &amp; polycyclic aromatic hydrocarbon degradation</b>                                                                                 |                    |                    |                     |                      |                    |                     |
| Naphthalene 1, 2-dioxygenase ( <i>nahAcAd</i> ) [EC 1.14.12.12]                                                                                      |                    | +                  |                     |                      |                    |                     |
| Naphthalene dihydrodiol dehydrogenase ( <i>nahB</i> ) [EC 1.3.1.29] / Cis-2, 3-dihydrobiphenyl-2, 3-diol dehydrogenase ( <i>bphB</i> ) [EC 1.3.1.56] |                    | +                  |                     |                      |                    | +                   |
| 1, 2-dihydroxynaphthalene dioxygenase ( <i>nahC</i> ) [EC 1.13.11.56] / Biphenyl-2, 3-diol 1, 2-dioxygenase ( <i>bphC</i> ) [EC 1.13.11.39]          |                    | +                  |                     | +                    |                    | +                   |
| 2-hydroxychromene-2-carboxylase ( <i>nahD</i> ) [EC 5.99.1.4]                                                                                        | +                  | +                  | +                   | +                    | +                  | +                   |
| trans-o-hydroxybenzylidenepyruvate hydratase-aldolase ( <i>nahE</i> ) [EC 4.1.2.45]                                                                  |                    | +                  |                     |                      |                    |                     |
| Salicylaldehyde dehydrogenase ( <i>nahF</i> ) [EC 1.2.1.65]                                                                                          |                    |                    |                     |                      |                    |                     |
| Salicylate 1-monooxygenase ( <i>nahG</i> ) [EC 1.14.13.1]                                                                                            |                    |                    |                     | +                    | +                  |                     |
| 2,6-dioxo-6-phenylhexa-3-enoate hydrolase ( <i>bphD</i> ) [EC 3.7.1.8]                                                                               | +                  |                    |                     | +                    |                    | +                   |
| 2-oxopent-4-enoate hydratase ( <i>bphE</i> ) [EC 4.2.1.80]                                                                                           |                    | +                  |                     |                      | +                  | +                   |
| 4-hydroxy-2-oxovalerate aldolase ( <i>bphF</i> ) [EC 4.1.3.39]                                                                                       |                    | +                  |                     |                      | +                  | +                   |
| <b>Single ring aromatic hydrocarbon degradation</b>                                                                                                  |                    |                    |                     |                      |                    |                     |
| Toluene methyl monooxygenase ( <i>xylMA</i> ) [EC 1.14.15.26]                                                                                        |                    | +                  |                     |                      |                    |                     |
| Aryl-alcohol dehydrogenase ( <i>xylB</i> ) [EC 1.1.1.90]                                                                                             |                    | +                  |                     |                      | +                  | +                   |
| Benzaldehyde dehydrogenase ( <i>xylC</i> ) [EC 1.2.1.28]                                                                                             |                    | +                  |                     |                      |                    |                     |
| Benzoate / toluate 1, 2-dioxygenase ( <i>benAB</i> / <i>xylXY</i> ) [EC 1.14.12.10]                                                                  | +                  | +                  |                     |                      | +                  | +                   |
| Dihydroxycyclohexadiene carboxylate dehydrogenase ( <i>benD</i> / <i>xylL</i> ) [EC 1.3.1.25]                                                        | +                  | +                  |                     | +                    | +                  |                     |
| Benzene / toluene 1, 2-dioxygenase ( <i>bnzAB</i> / <i>todC1C2</i> ) [EC 1.14.12.3]                                                                  |                    | +                  |                     |                      |                    |                     |
| Phenol / toluene 2-monooxygenase ( <i>poxABCDE</i> ) [EC 1.14.13.243, 1.14.13.244]                                                                   |                    | +                  |                     |                      | +                  |                     |
| Catechol 1, 2-dioxygenase ( <i>catA</i> ) [EC 1.13.11.1]                                                                                             | +                  | +                  |                     | +                    | +                  |                     |
| Muconate cycloisomerase ( <i>catB</i> ) [EC 5.5.1.1]                                                                                                 | +                  | +                  |                     | +                    | +                  |                     |
| Muconolactone D-isomerase ( <i>catC</i> ) [EC 5.3.3.4]                                                                                               | +                  | +                  |                     | +                    | +                  |                     |
| 3-oxoadipate enol-lactonase ( <i>catD</i> / <i>pcaD</i> ) [EC 3.1.1.24]                                                                              | +                  | +                  | +                   | +                    | +                  | +                   |
| 3-oxoadipate CoA-transrase ( <i>catLJ</i> / <i>pcaLJ</i> ) [EC 2.8.3.6]                                                                              | +                  | +                  | +                   | +                    | +                  |                     |
| 3-oxoadipyl-CoA thiolase ( <i>catF</i> / <i>pcaF</i> ) [EC 2.3.1.16 / 2.3.1.174]                                                                     | +                  | +                  | +                   | +                    | +                  | +                   |
| Protocatechuate 3, 4-dioxygenase ( <i>pcaGH</i> ) [EC 1.13.11.3]                                                                                     | +                  |                    | +                   |                      | +                  |                     |
| 3-carboxy-cis, cis-muconate cycloisomerase ( <i>pcaB</i> ) [EC 5.5.1.2]                                                                              | +                  |                    | +                   |                      | +                  |                     |
| 4-carboxymuconolactone decarboxylase ( <i>pcaC</i> ) [EC 4.1.1.44]                                                                                   | +                  | +                  | +                   | +                    | +                  |                     |
| Catechol 2, 3-dioxygenase ( <i>xylE</i> ) [EC 1.13.11.2]                                                                                             |                    | +                  | +                   | +                    | +                  |                     |
| 2-hydroxymuconate-semialdehyde hydrolase ( <i>xylF</i> ) [EC 3.7.1.9]                                                                                |                    | +                  |                     |                      |                    |                     |
| 2-hydroxymuconate-6-semialdehyde dehydrogenase ( <i>xylG</i> ) [EC 1.2.1.85]                                                                         |                    | +                  |                     | +                    | +                  | +                   |
| 4-oxalocrotonate tautomerase ( <i>xylH</i> ) [EC 5.3.2.6]                                                                                            |                    | +                  | +                   | +                    | +                  |                     |
| 2-oxo-3-hexenedioate decarboxylase ( <i>xylI</i> ) [EC 4.1.1.77]                                                                                     |                    | +                  |                     | +                    | +                  |                     |
| 2-oxopent-4-enoate hydratase ( <i>xylJ</i> ) [EC 4.2.1.80]                                                                                           |                    | +                  |                     |                      | +                  | +                   |
| 4-hydroxy-2-oxovalerate aldolase ( <i>xylK</i> ) [EC 4.1.3.39]                                                                                       |                    | +                  |                     |                      | +                  | +                   |
| Gentisate 1, 2-dioxygenase ( <i>nagI</i> ) [EC 1.13.11.4]                                                                                            | +                  | +                  |                     | +                    | +                  | +                   |
| Maleypyruvate isomerase ( <i>nagL</i> ) [EC 5.2.1.4]                                                                                                 | +                  | +                  |                     | +                    | +                  | +                   |
| Fumarylpyruvate hydrolase ( <i>nagK</i> ) [EC 3.7.1.20]                                                                                              | +                  | +                  |                     | +                    | +                  |                     |
| Anthranilate 1, 2-dioxygenase ( <i>antAB</i> ) [EC 1.14.12.1]                                                                                        | +                  | +                  |                     | +                    |                    |                     |
| 3-phenylpropanoate dioxygenase ( <i>hcaEF</i> ) [EC 1.14.12.19]                                                                                      |                    | +                  |                     |                      |                    | +                   |
| <b>Alkane degradation</b>                                                                                                                            |                    |                    |                     |                      |                    |                     |
| Alkane 1-monooxygenase ( <i>alkB</i> ) [EC 1.14.15.3]                                                                                                | +                  | +                  |                     |                      |                    |                     |
| (Putative) Cytochrome P450 CYP153 family alkane monooxygenase                                                                                        |                    | +                  |                     |                      |                    | +                   |
| (Putative) Flavin-binding alkane monooxygenase ( <i>almA</i> )                                                                                       | +                  |                    |                     |                      | +                  | +                   |
| Alcohol dehydrogenase ( <i>adh</i> ) [EC 1.1.1.1]                                                                                                    | +                  | +                  | +                   | +                    | +                  | +                   |
| Aldehyde dehydrogenase ( <i>aldh</i> ) [EC 1.2.1.3]                                                                                                  | +                  | +                  | +                   | +                    | +                  | +                   |
| Acyl-CoA synthetase ( <i>acs</i> ) [EC 6.2.1.3]                                                                                                      | +                  | +                  | +                   | +                    | +                  | +                   |

**Table S4.** Results of LC/ESI(-)-MS/MS analyses of sample extracts to identify biotransformation products of different parent aromatic compounds discussed in Figure 5.

| Product detected         | Parent compound <sup>a</sup> | Strain | Detected [M – H] <sup>-</sup> | <i>t<sub>R</sub></i> <sup>b</sup> (min) | CID <sup>c</sup> (eV) | Diagnostic fragments from product ion scan analyses (% relative intensity)                                                                                                                                                                                                                                                                                                                                        |
|--------------------------|------------------------------|--------|-------------------------------|-----------------------------------------|-----------------------|-------------------------------------------------------------------------------------------------------------------------------------------------------------------------------------------------------------------------------------------------------------------------------------------------------------------------------------------------------------------------------------------------------------------|
| salicylic acid           | phenanthrene                 | KK22   | 137                           | 3.4                                     | 8                     | 137 (M <sup>-</sup> , 100), 93 (M <sup>-</sup> – CO <sub>2</sub> , 50)                                                                                                                                                                                                                                                                                                                                            |
| 1,2-dihydroxynaphthalene | phenanthrene                 | KK22   | 159                           | 6.3                                     | 8                     | 159 (M <sup>-</sup> , 100), 141 (M <sup>-</sup> – H <sub>2</sub> O, 3), 131 (M <sup>-</sup> – CO, 1), 127 (C <sub>10</sub> H <sub>7</sub> <sup>-</sup> , 2), 115 (C <sub>9</sub> H <sub>7</sub> <sup>-</sup> , 5), 113 (M <sup>-</sup> – CO – H <sub>2</sub> O, 6), 101 (C <sub>8</sub> H <sub>5</sub> <sup>-</sup> , 2), 97 (2), 87 (1), 85 (1), 83 (1)                                                          |
| salicylic acid           | naphthalene                  | KK22   | 137                           | 3.5                                     | 8                     | 137 (M <sup>-</sup> , 100), 93 (M <sup>-</sup> – CO <sub>2</sub> , 29)                                                                                                                                                                                                                                                                                                                                            |
| 1,2-dihydroxynaphthalene | naphthalene                  | KK22   | 159                           | 6.3                                     | 8                     | 159 (M <sup>-</sup> , 100), 141 (M <sup>-</sup> – H <sub>2</sub> O, 5), 127 (C <sub>10</sub> H <sub>7</sub> <sup>-</sup> , 1), 115 (C <sub>9</sub> H <sub>7</sub> <sup>-</sup> , 14), 113 (M <sup>-</sup> – CO – H <sub>2</sub> O, 3), 101 (C <sub>8</sub> H <sub>5</sub> <sup>-</sup> , 5), 97 (14), 87 (1), 85 (1), 83 (1)                                                                                      |
| salicylic acid           | 1-hydroxy-2-naphthoic acid   | KK22   | 137                           | 3.5                                     | 8                     | 137 (M <sup>-</sup> , 100), 93 (M <sup>-</sup> – CO <sub>2</sub> , 27)                                                                                                                                                                                                                                                                                                                                            |
| 1,2-dihydroxynaphthalene | 1-hydroxy-2-naphthoic acid   | KK22   | 159                           | 6.2                                     | 8                     | 159 (M <sup>-</sup> , 100), 141 (M <sup>-</sup> – H <sub>2</sub> O, 2), 131 (M <sup>-</sup> – CO, 1), 127 (C <sub>10</sub> H <sub>7</sub> <sup>-</sup> , 1), 115 (C <sub>9</sub> H <sub>7</sub> <sup>-</sup> , 4), 113 (M <sup>-</sup> – CO – H <sub>2</sub> O, 5), 101 (C <sub>8</sub> H <sub>5</sub> <sup>-</sup> , 1), 97 (3), 87 (1), 85 (1), 83 (2)                                                          |
| benzoic acid             | toluene                      | KK22   | 121                           | 6.0                                     | 8                     | 121 (M <sup>-</sup> , 100), 77 (M <sup>-</sup> – CO <sub>2</sub> , 41)                                                                                                                                                                                                                                                                                                                                            |
| catechol <sup>d</sup>    | benzoic acid                 | KK22   | 141                           | 5.8                                     | 8                     | 141 (M <sup>-</sup> , 14), 123 (M <sup>-</sup> – H <sub>2</sub> O, 20), 109 (M <sup>-</sup> – CH <sub>3</sub> OH, 100), 97 (C <sub>5</sub> H <sub>5</sub> O <sub>2</sub> <sup>-</sup> , 6), 91 (M <sup>-</sup> – CH <sub>3</sub> OH – H <sub>2</sub> O, 5), 79 (C <sub>5</sub> H <sub>5</sub> O <sub>2</sub> <sup>-</sup> – H <sub>2</sub> O, 13), 77 (C <sub>6</sub> H <sub>5</sub> <sup>-</sup> , 14)           |
| catechol <sup>d</sup>    | salicylic acid               | KK22   | 141                           | 5.9                                     | 8                     | 141 (M <sup>-</sup> , 26), 123 (M <sup>-</sup> – H <sub>2</sub> O, 11), 109 (M <sup>-</sup> – CH <sub>3</sub> OH, 100), 97 (C <sub>5</sub> H <sub>5</sub> O <sub>2</sub> <sup>-</sup> , 17), 91 (M <sup>-</sup> – CH <sub>3</sub> OH – H <sub>2</sub> O, 7), 77 (C <sub>6</sub> H <sub>5</sub> <sup>-</sup> , 1)                                                                                                  |
| catechol <sup>d</sup>    | benzoic acid                 | KK10   | 141                           | 5.8                                     | 8                     | 141 (M <sup>-</sup> , 48), 123 (M <sup>-</sup> – H <sub>2</sub> O, 41), 109 (M <sup>-</sup> – CH <sub>3</sub> OH, 100), 97 (C <sub>5</sub> H <sub>5</sub> O <sub>2</sub> <sup>-</sup> , 43), 91 (M <sup>-</sup> – CH <sub>3</sub> OH – H <sub>2</sub> O, 13), 79 (C <sub>5</sub> H <sub>5</sub> O <sub>2</sub> <sup>-</sup> – H <sub>2</sub> O, 15), 77 (C <sub>6</sub> H <sub>5</sub> <sup>-</sup> , 17), 69 (3) |
| catechol <sup>d</sup>    | salicylic acid               | KK10   | 141                           | 5.9                                     | 8                     | 141 (M <sup>-</sup> , 93), 123 (M <sup>-</sup> – H <sub>2</sub> O, 44), 109 (M <sup>-</sup> – CH <sub>3</sub> OH, 100), 97 (C <sub>5</sub> H <sub>5</sub> O <sub>2</sub> <sup>-</sup> , 19), 91 (M <sup>-</sup> – CH <sub>3</sub> OH – H <sub>2</sub> O, 9), 79 (C <sub>5</sub> H <sub>5</sub> O <sub>2</sub> <sup>-</sup> – H <sub>2</sub> O, 41), 77 (C <sub>6</sub> H <sub>5</sub> <sup>-</sup> , 6), 69 (1)   |
| catechol <sup>d</sup>    | benzoic acid                 | KK8    | 141                           | 5.9                                     | 8                     | 141 (M <sup>-</sup> , 25), 123 (M <sup>-</sup> – H <sub>2</sub> O, 45), 109 (M <sup>-</sup> – CH <sub>3</sub> OH, 100), 97 (C <sub>5</sub> H <sub>5</sub> O <sub>2</sub> <sup>-</sup> , 17), 91 (M <sup>-</sup> – CH <sub>3</sub> OH – H <sub>2</sub> O, 12), 79 (C <sub>5</sub> H <sub>5</sub> O <sub>2</sub> <sup>-</sup> – H <sub>2</sub> O, 21), 77 (C <sub>6</sub> H <sub>5</sub> <sup>-</sup> , 12), 69 (3) |
| catechol <sup>d</sup>    | salicylic acid               | KK8    | 141                           | 5.8                                     | 8                     | 141 (M <sup>-</sup> , 45), 123 (M <sup>-</sup> – H <sub>2</sub> O, 12), 109 (M <sup>-</sup> – CH <sub>3</sub> OH, 100), 97 (C <sub>5</sub> H <sub>5</sub> O <sub>2</sub> <sup>-</sup> , 8), 91 (M <sup>-</sup> – CH <sub>3</sub> OH – H <sub>2</sub> O, 9), 79 (C <sub>5</sub> H <sub>5</sub> O <sub>2</sub> <sup>-</sup> – H <sub>2</sub> O, 10), 77 (C <sub>6</sub> H <sub>5</sub> <sup>-</sup> , 10), 69 (3)   |
| catechol <sup>d</sup>    | benzoic acid                 | KK6    | 141                           | 5.9                                     | 8                     | 141 (M <sup>-</sup> , 29), 123 (M <sup>-</sup> – H <sub>2</sub> O, 31), 109 (M <sup>-</sup> – CH <sub>3</sub> OH, 100), 97 (C <sub>5</sub> H <sub>5</sub> O <sub>2</sub> <sup>-</sup> , 36), 91 (M <sup>-</sup> – CH <sub>3</sub> OH – H <sub>2</sub> O, 11), 79 (C <sub>5</sub> H <sub>5</sub> O <sub>2</sub> <sup>-</sup> – H <sub>2</sub> O, 4), 77 (C <sub>6</sub> H <sub>5</sub> <sup>-</sup> , 10), 69 (1)  |
| gentisic acid            | salicylic acid               | KK8    | 153                           | 3.6                                     | 20                    | 153 (M <sup>-</sup> , 30), 135 (M <sup>-</sup> – H <sub>2</sub> O, 14), 109 (M <sup>-</sup> – CO <sub>2</sub> , 100), 108 (73), 91 (M <sup>-</sup> – CO <sub>2</sub> – H <sub>2</sub> O, 10), 81 (M <sup>-</sup> – CO <sub>2</sub> – CO, 11)                                                                                                                                                                      |

<sup>a</sup> Parent compounds were administered as the sole source of carbon and energy at a concentration of 50 mg/l each except for 1,2-dihydroxynaphthalene which was administered at 25 mg/l.

<sup>b</sup> *t<sub>R</sub>*, retention time.

<sup>c</sup> Collision induced dissociation energy.

<sup>d</sup> Catechol was detected as its methanol adduct in ESI negative ionization mode, [M – H]<sup>-</sup> = 141.

**Table S5.** Presence of flagellar formation and chemotaxis genes in the bacterial MAGs.

|                                                                                | <i>Pseudomonas</i> | <i>Sphingobium</i> | <i>Ochrobactrum</i> | <i>Achromobacter</i> | <i>Cupriavidus</i> | <i>Parvibaculum</i> |
|--------------------------------------------------------------------------------|--------------------|--------------------|---------------------|----------------------|--------------------|---------------------|
| flagella basal-body P-ring protein FlgA                                        | +                  | +                  | +                   | +                    | +                  | +                   |
| flagellar basal-body rod protein FlgB                                          | +                  | +                  | +                   | +                    | +                  | +                   |
| flagellar basal-body rod protein FlgC                                          | +                  | +                  | +                   | +                    | +                  | +                   |
| flagellar basal-body rod modification protein FlgD                             | +                  | +                  | +                   | +                    | +                  | +                   |
| flagellar hook protein FlgE                                                    | +                  | +                  | +                   | +                    | +                  | +                   |
| flagellar basal-body rod protein FlgF                                          | +                  | +                  | +                   | +                    | +                  | +                   |
| flagellar basal-body rod protein FlgG                                          | +                  | +                  | +                   | +                    | +                  | +                   |
| flagellar L-ring protein precursor FlgH                                        | +                  | +                  | +                   | +                    | +                  | +                   |
| flagellar P-ring protein precursor FlgI                                        | +                  | +                  | +                   | +                    | +                  | +                   |
| flagellar protein FlgJ                                                         |                    |                    |                     | +                    | +                  |                     |
| flagellar hook-associated protein 1 FlgK                                       | +                  | +                  | +                   | +                    | +                  | +                   |
| flagellar hook-associated protein 3 FlgL                                       | +                  | +                  | +                   | +                    | +                  |                     |
| negative regulator of flagellin synthesis FlgM                                 | +                  | +                  |                     | +                    | +                  |                     |
| flagella synthesis protein FlgN                                                |                    |                    |                     | +                    | +                  |                     |
| flagellar biosynthesis protein FlhA                                            | +                  | +                  | +                   | +                    | +                  | +                   |
| flagellar biosynthetic protein FlhB                                            | +                  | +                  | +                   | +                    | +                  | +                   |
| flagellar transcriptional activator FlhC                                       |                    |                    |                     | +                    | +                  |                     |
| flagellar transcriptional activator FlhD                                       |                    |                    |                     | +                    | +                  |                     |
| flagellar biosynthesis protein FlhF                                            | +                  |                    |                     |                      |                    |                     |
| flagellin (FliC)                                                               | +                  | +                  | +                   | +                    | +                  |                     |
| flagellar hook-associated protein 2 (FliD)                                     | +                  | +                  |                     | +                    | +                  |                     |
| flagellar hook-basal body complex protein FliE                                 | +                  | +                  | +                   | +                    | +                  | +                   |
| flagellar M-ring protein FliF                                                  | +                  | +                  | +                   | +                    | +                  | +                   |
| flagellar motor switch protein FliG                                            | +                  | +                  | +                   | +                    | +                  | +                   |
| flagellar assembly protein FliH                                                | +                  | +                  |                     | +                    | +                  | +                   |
| flagellum-specific ATP synthase (FliI)                                         | +                  | +                  | +                   | +                    | +                  | +                   |
| flagellar FliJ protein                                                         | +                  |                    |                     | +                    | +                  |                     |
| flagellar hook-length control protein FliK                                     | +                  |                    |                     | +                    | +                  |                     |
| flagellar FliL protein                                                         | +                  |                    |                     | +                    | +                  |                     |
| flagellar motor switch protein FliM                                            | +                  | +                  | +                   | +                    | +                  | +                   |
| flagellar motor switch protein FliN/FliY                                       | +                  | +                  | +                   | +                    | +                  | +                   |
| flagellar protein FliO/FliZ                                                    | +                  | +                  |                     | +                    | +                  | +                   |
| flagellar biosynthetic protein FliP                                            | +                  | +                  | +                   | +                    | +                  | +                   |
| flagellar biosynthetic protein FliQ                                            | +                  | +                  | +                   | +                    | +                  | +                   |
| flagellar biosynthetic protein FliR                                            | +                  | +                  | +                   | +                    | +                  | +                   |
| flagellar protein FliS                                                         | +                  | +                  |                     | +                    | +                  |                     |
| flagellar protein FliT                                                         |                    |                    |                     | +                    | +                  |                     |
| chemotaxis protein MotA                                                        | +                  | +                  | +                   | +                    | +                  | +                   |
| chemotaxis protein MotB                                                        | +                  | +                  | +                   | +                    | +                  | +                   |
| two-component system, chemotaxis family, sensor kinase CheA [EC:2.7.13.3]      | +                  | +                  |                     | +                    | +                  |                     |
| two-component system, chemotaxis family, response regulator CheB [EC:3.1.1.61] | +                  | +                  | +                   | +                    | +                  | +                   |
| chemotaxis protein CheC                                                        |                    | +                  |                     |                      |                    |                     |
| chemotaxis protein CheD [EC:3.5.1.44]                                          | +                  |                    |                     | +                    | +                  |                     |
| chemotaxis protein methyltransferase CheR [EC:2.1.1.80]                        | +                  | +                  | +                   | +                    | +                  | +                   |
| two-component system, chemotaxis family, response regulator CheV               | +                  |                    |                     |                      | +                  |                     |
| purine-binding chemotaxis protein CheW                                         | +                  | +                  |                     | +                    | +                  | +                   |
| chemotaxis protein CheX                                                        |                    |                    |                     |                      |                    |                     |
| two-component system, chemotaxis family, response regulator CheY               | +                  | +                  | +                   | +                    | +                  | +                   |
| chemotaxis protein CheZ                                                        | +                  |                    |                     | +                    | +                  |                     |
| aerotaxis receptor                                                             | +                  |                    |                     | +                    | +                  | +                   |
| methyl-accepting chemotaxis protein                                            | +                  | +                  |                     | +                    | +                  | +                   |

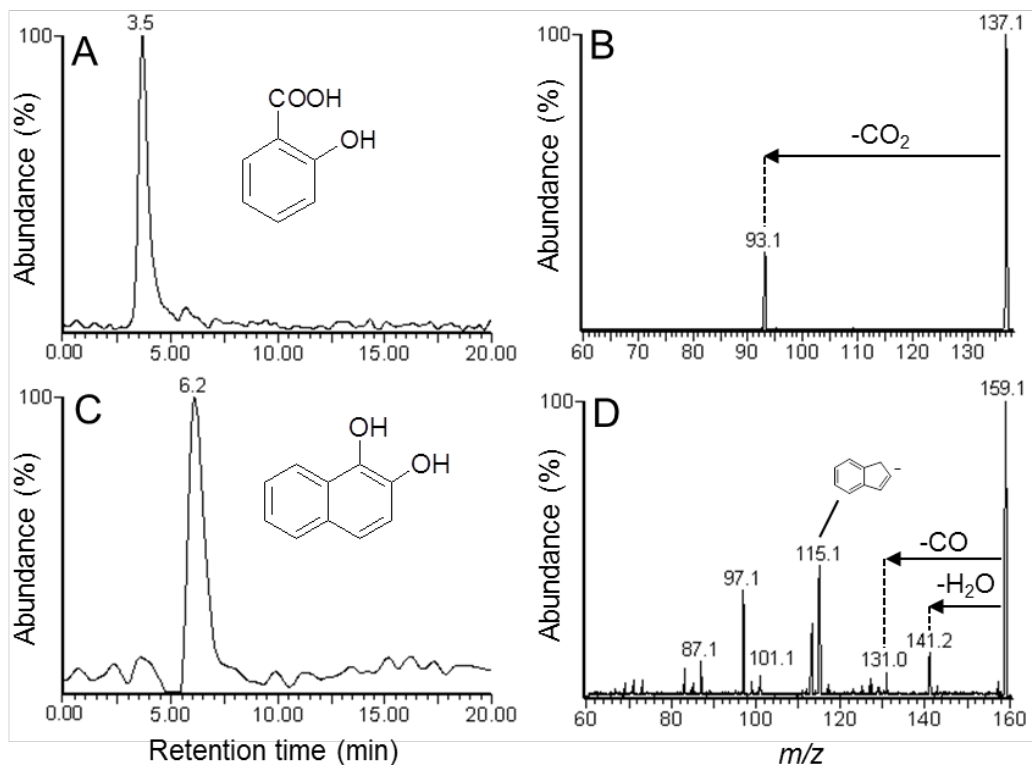

**Figure S1.** Results of LC/ESI(-)-MS/MS analyses of extracts from SBM where *S. barthaii* KK22 was exposed to 50 mg/l of 1-hydroxy-2-naphthoic acid. (A) Extracted ion chromatogram of a metabolite of 1-hydroxy-2-naphthoic acid that corresponded to  $[M - H]^- = 137$ ; identified as salicylic acid (shown); (B) Results of product ion scan analysis of the metabolite that corresponded to  $[M - H]^- = 137$ ; (C) Extracted ion chromatogram of metabolite of 1-hydroxy-2-naphthoic acid that corresponded to  $[M - H]^- = 159$ ; identified as 1,2-dihydroxynaphthalene (shown); (D) Results of product ion scan analysis of the metabolite that corresponded to  $[M - H]^- = 159$ . The baseline from  $m/z$  60 to  $m/z$  158 was magnified 5 fold.

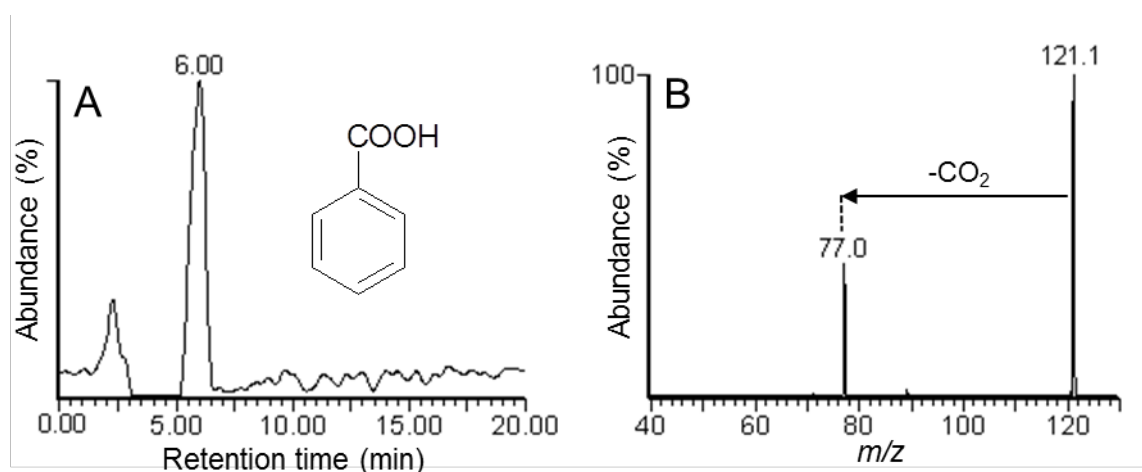

**Figure S2.** Results of LC/ESI(-)-MS/MS analyses of extracts from SBM where *S. barthaii* KK22 was exposed to 50 mg/l of toluene. (A) Extracted ion chromatogram of a metabolite of toluene that corresponded to  $[M - H]^- = 121$ ; identified as benzoic acid (shown); (B) Results of product ion scan analysis of the metabolite that corresponded to  $[M - H]^- = 121$ .

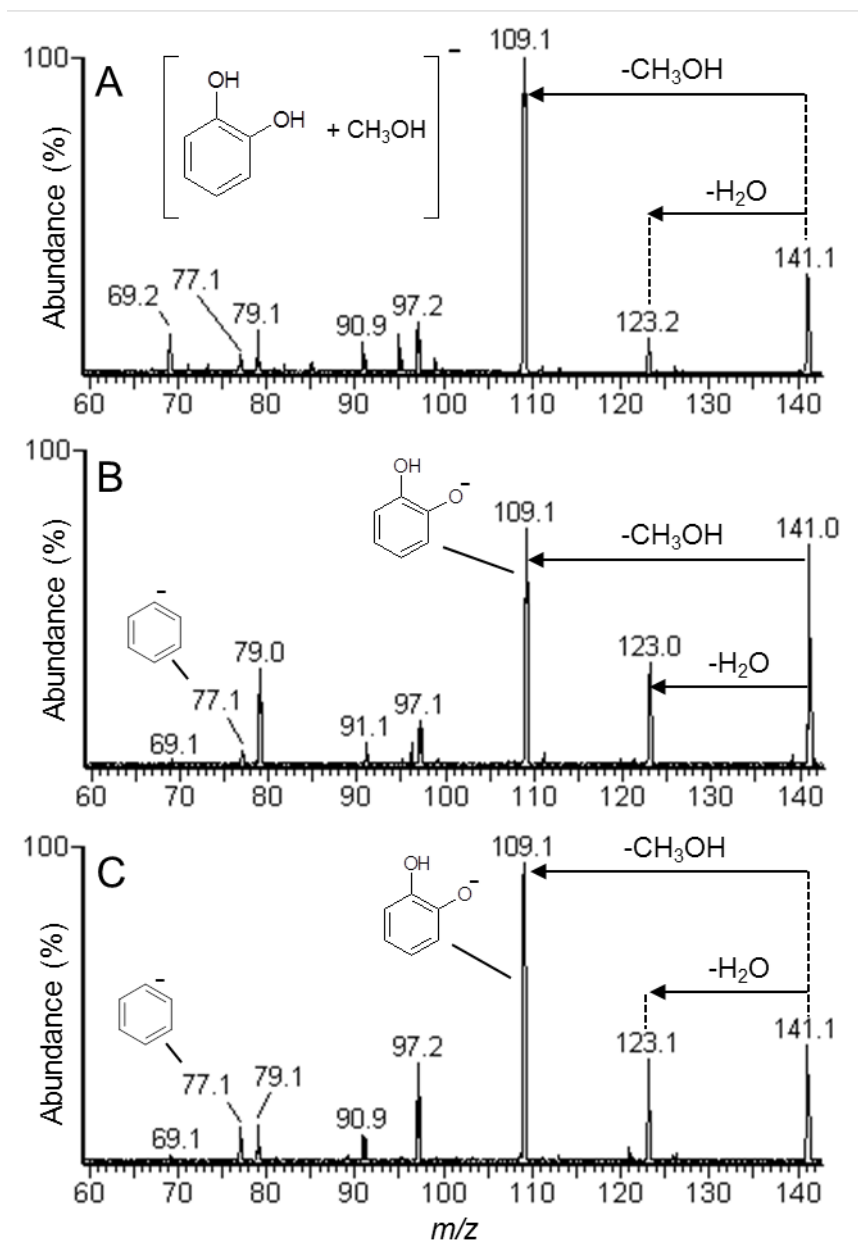

**Figure S3.** Results of LC/ESI(-)-MS/MS analyses of the deprotonated molecule,  $[M - H]^- = 141$  for (A) an authentic standard of catechol; (B) for a metabolite detected in extracts from SBM where *Cupriavidus* strain KK10 was exposed to 50 mg/l of salicylic acid; (C) for a metabolite detected in extracts from SBM where *Cupriavidus* strain KK10 was exposed to 50 mg/l of benzoic acid. Catechol was detected as its methanol adduct as shown in (A) under negative ionization mode conditions. The baselines from  $m/z$  60 to  $m/z$  108 was magnified 5 fold in all spectra.



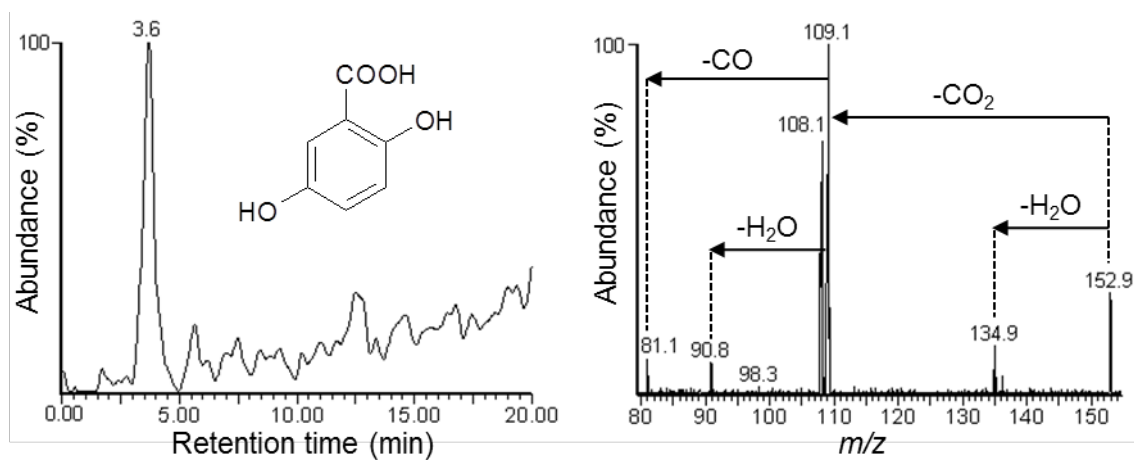

**Figure S4.** Results of LC/ESI(-)-MS/MS analyses of extracts from SBM where *Achromobacter* strain KK8 was exposed to 50 mg/l of salicylic acid. (A) Extracted ion chromatogram of a metabolite of salicylic acid that corresponded to  $[M - H]^- = 153$ ; identified as gentisic acid (shown); (B) Results of product ion scan analysis of the metabolite that corresponded to  $[M - H]^- = 153$ .
